# Supplementary material for: Anoxic conditions maintained high phosphorus sorption in humid tropical forest soils
Source: Copernicus journal article supplement (doi:10.5194/bg-2019-62), 2019-02-26
Supplement: Supplementary file 1 [file bg-2019-62-supplement.pdf]

1

## Supplementary Material

2 Table S1. Phosphorus sorption index (PSI, L kg<sup>-1</sup> soil) calculated at four levels of P addition  
 3 levels ( $n = 4$ ).

| Site       | Position | Treatment | 500 mg P kg <sup>-1</sup> | 1000 mg P kg <sup>-1</sup> | 5000 mg P kg <sup>-1</sup> | 10,000 mg P kg <sup>-1</sup> |
|------------|----------|-----------|---------------------------|----------------------------|----------------------------|------------------------------|
| El Verde   | Slope    | Anoxic    | 616±70a                   | 505±14a                    | 1018±19a                   | 1513±31a                     |
|            |          | Oxic      | 363±18b                   | 405±14b                    | 877±29b                    | 1236±27b                     |
|            | Valley   | Anoxic    | 637±86a                   | 740±28b                    | 1622±62a                   | 2079±109a                    |
|            |          | Oxic      | -385±152b                 | 1229±147a                  | 1408±16b                   | 1893±62a                     |
| Rio Icacos | Slope    | Anoxic    | 1552±267a                 | 785±59a                    | 972±25a                    | 1398±17a                     |
|            |          | Oxic      | 783±21b                   | 565±5b                     | 614±48b                    | 967±29b                      |
|            | Valley   | Anoxic    | 12143±4275a               | 1257±150a                  | 1218±26a                   | 1883±157a                    |
|            |          | Oxic      | -1635±2527b               | 954±53a                    | 1073±59a                   | 1266±157b                    |

4 Different letters indicate significant differences at  $\alpha = 0.05$ .

5 Table S2. Saturation index of vivianite calculated by Visual MINTEQ using soluble Fe(II),  
 6 inorganic P, and solution pH as input. Results from slope soils from El Verde under anoxic  
 7 conditions are shown. Bold values indicate oversaturation.

| P loading rate<br>(mg P kg <sup>-1</sup> soil)                       | 500        | 1000       | 5000       | 10,000     |
|----------------------------------------------------------------------|------------|------------|------------|------------|
| Average HCl-Fe(II) (mg g <sup>-1</sup> soil)                         | 3.4        | 3.4        | 3.4        | 3.4        |
| Estimated water-soluble Fe(II)<br>(mg L <sup>-1</sup> ) <sup>a</sup> | 34         | 34         | 34         | 34         |
| Average P in solution (mg P L <sup>-1</sup> )                        | 5.5        | 26.4       | 249.5      | 571.3      |
| Soil pH <sup>b</sup>                                                 | 5.9        | 5.9        | 5.9        | 5.9        |
| Saturation index <sup>c</sup>                                        | <b>3.5</b> | <b>4.8</b> | <b>5.9</b> | <b>5.9</b> |

8 <sup>a</sup> Peretyazhko and Sposito (2005) found that ~10% of the HCl-Fe(II) was soluble in H<sub>2</sub>O in a  
 9 similar soil after anaerobic incubation, which is consistent with Fe(II) sorption reported by  
 10 Wilmoth et al. (2018); the soil:water ratio was 1:10 (mass:volume).

11 <sup>b</sup> estimated based on similar soils (Lin et al. unpublished)

12

13

14

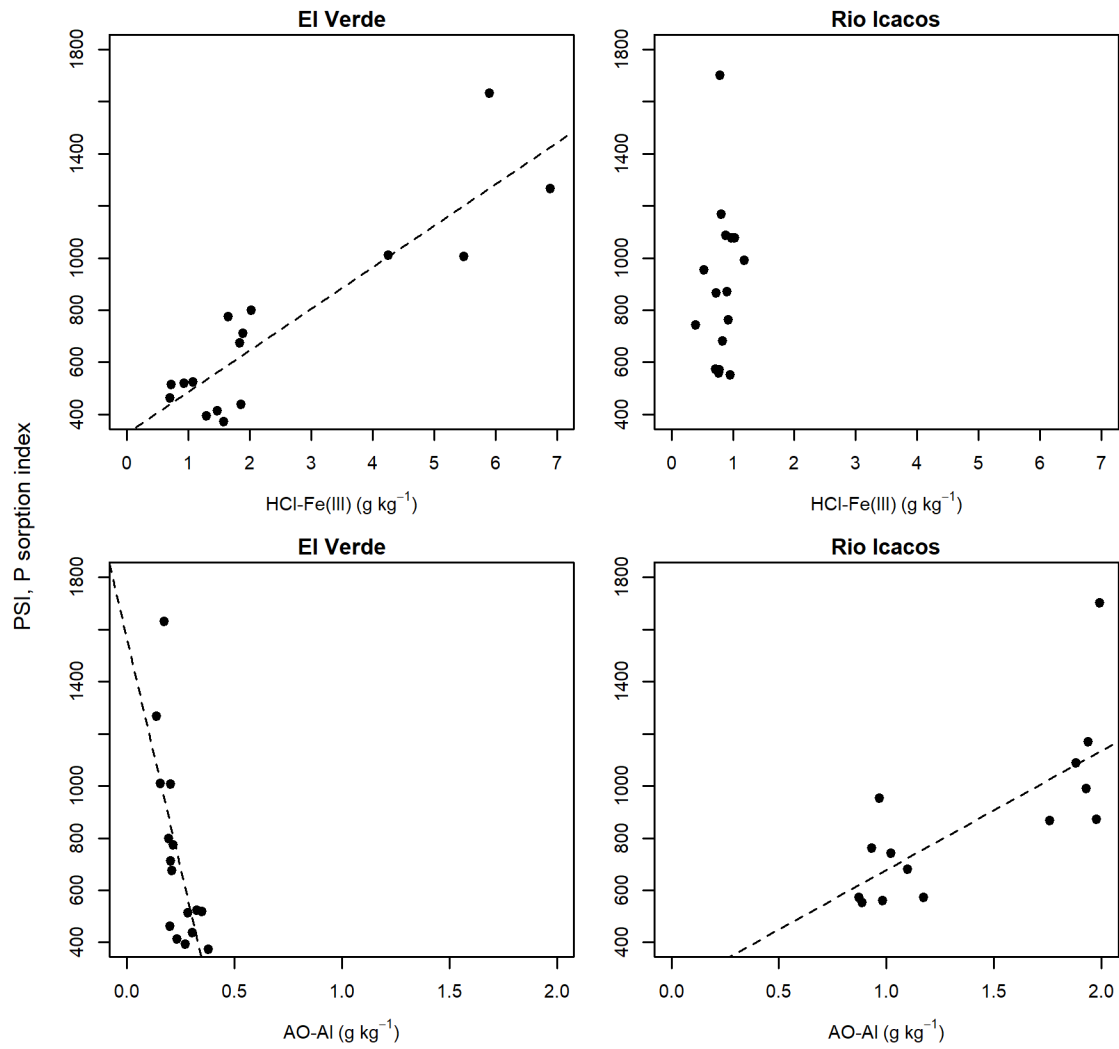

15

16 Figure S1. Correlations between phosphorus sorption index (PSI) and soil HCl-extractable  
17 Fe(III) (HCl-Fe(III)) and ammonium oxalate-extractable Al (AO-Al) concentrations at El Verde  
18 and Rio Icacos. Dash lines indicate significant correlations.

19

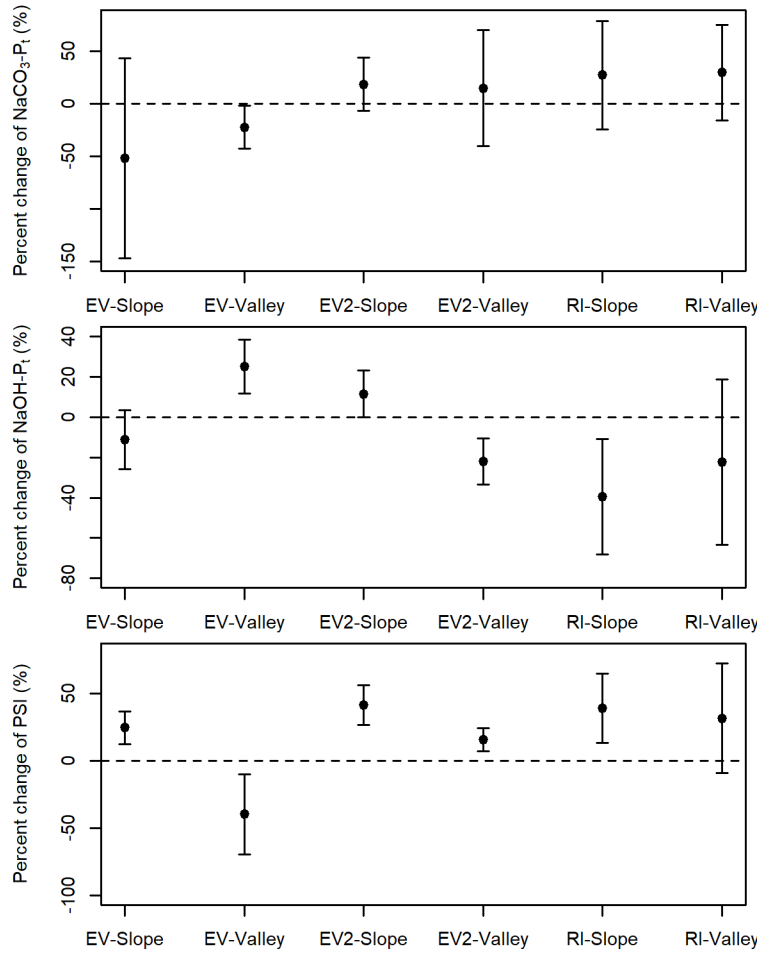

20

21 Figure S2. Percent changes of soil  $\text{NaHCO}_3$ -extractable total P ( $\text{NaHCO}_3\text{-P}_t$ ) concentration,

22  $\text{NaOH}$ -extractable total P ( $\text{NaOH-P}_t$ ) concentration, and phosphorus sorption index (PSI) in

23 response to anoxic conditions. Error bars indicate 95% confidence interval. EV-2 refers to the 2<sup>nd</sup>

24 sampling of El Verde soils for measuring the solubility of sorbed P.

25
